## 202

## Discriminating between exercise induced cardiac remodeling and dilated cardiomyopathy using exercise cardiac MRI

Le TT.; Bryant JA.; Ang BWY; Pua CJ.; Su BWY; Ho PY.; Lim S.; Huang W.; Lee PT.; Tang HC.; Chin CT.; Tan BY.; Cook SA.; Chin CW.  
National Heart Centre Singapore (NHCS), Singapore, Singapore

**Funding Acknowledgements:** National Medical Research Council, Singapore

### Aims

The imaging features of dilated cardiomyopathy (DCM) overlap with those of exercise-induced cardiac remodeling in physically active individuals. We hypothesize that exercise stress imaging has value in diagnosing DCM and may help discriminate between DCM and exercise-induced remodeling.

**Methods:** Normal reference ranges in peak exercise cardiac index (PeakCI) were defined in 100 healthy volunteers (48% males;  $38 \pm 11$  years) using a validated exercise stress cardiovascular magnetic resonance (CMR; 1.5T Siemens Aera) protocol. Exercise stress CMR and genetic sequencing were performed in 60 patients (93% males;  $34 \pm 14$  years) with clinically suspected DCM (dilated left ventricle and/or impaired systolic function). Patients with pathogenic gene mutations were defined as confirmed genotype and phenotype positive cardiomyopathy (G + P+). The primary outcome was defined as a composite of all-cause mortality or cardiac decompensation (heart failure or arrhythmic events).

**Results:** PeakCI demonstrated excellent discrimination between G + P+ cardiomyopathy and healthy volunteers (c-statistics 0.89; 95% CI: 0.82-0.96;  $P < 0.0001$ ). PeakCI at 35th percentile had a sensitivity of 100% and specificity of 66% for the diagnosis of G + P+ cardiomyopathy (Figure A), providing further incremental value over clinical parameters (age, sex, dilated left ventricle and impaired systolic ejection fraction), change in exercise ejection fraction and longitudinal strain ( $P = 0.001$ ). Over  $14 \pm 9$  months of follow-up, patients with PeakCI less than 35th percentile had worse prognosis compared to those with higher exercise capacity ( $P = 0.02$ ) (Figure B).

**Conclusion:** Exercise stress CMR differentiates individuals with genotype positive DCM from exercise-induced cardiac remodeling. The PeakCI normal ranges and DCM threshold established here provide added diagnostic and prognostic value that informs patient management.

Abstract 202 Figure. (A) PeakCI vs Gene; (B) Outcome analysis

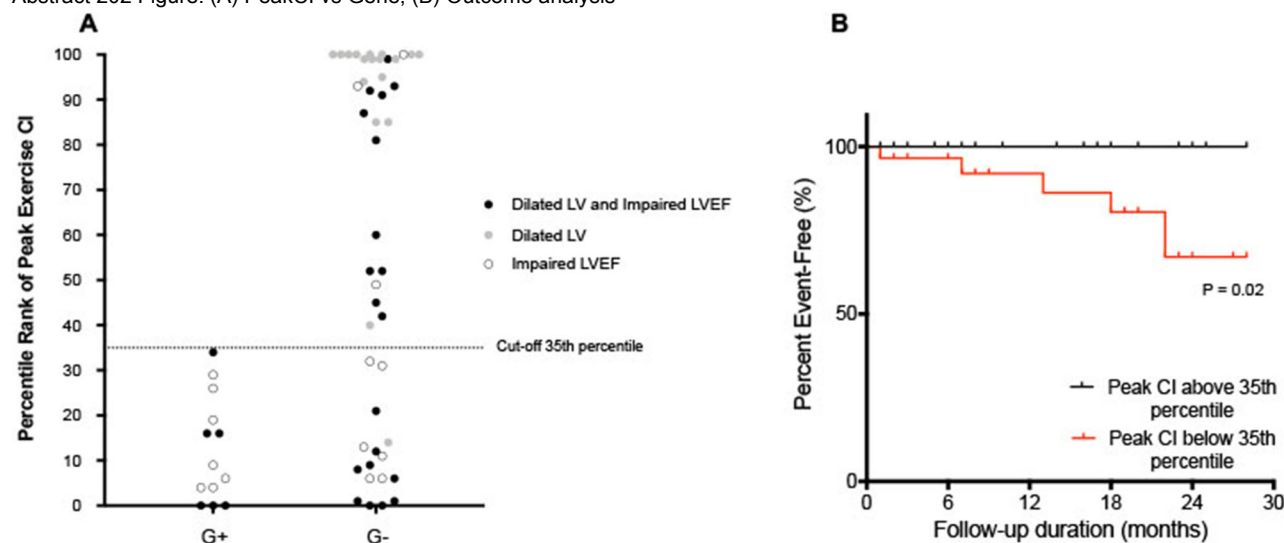

Source: http://academic.oup.com/ehjcimaging/article-pdf/20/Supplement_2/jez128.003/28764993/jez128.003.pdf
